# Supplementary material for: DFT Exploration of Metal Ion–Ligand Binding: Toward Rational Design of Chelating Agent in Semiconductor Manufacturing
Source: MDPI journal article supplement (doi:10.3390/molecules29020308), 2024-01-08
Supplement: s1 [file s1]

## 1. Structural optimization

The optimized structures of metal ion hydrates are shown in Figure S1. After structural optimization using the computational method described in section 2 of the main text, the four types of metal ion hydrates present regular polygonal structures. Table S1 lists the calculated and the theoretical bond lengths of these hydrates.

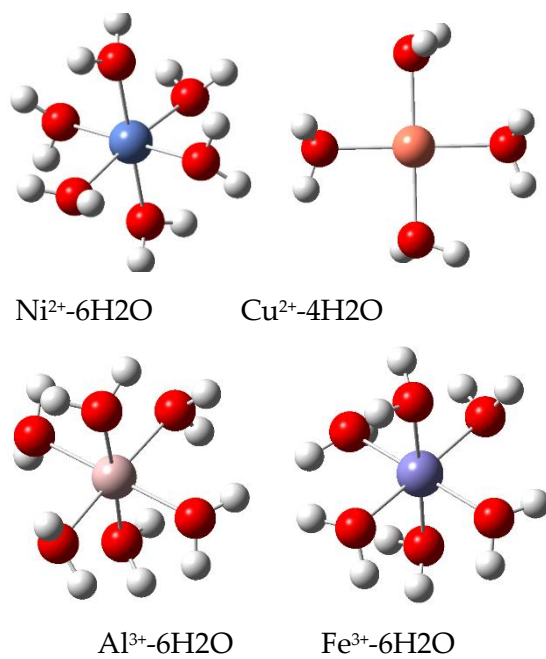

**Figure S1.** Geometrically optimized structure of four metal ionic hydrates.

**Table S1.** Table of theoretical and calculated values for metal ion coordination bond lengths.

| Metal ions       | Item                |                                |                              |
|------------------|---------------------|--------------------------------|------------------------------|
|                  | Coordination number | Theoretical bond length<br>(Å) | Calculate bond length<br>(Å) |
| Ni <sup>2+</sup> | 6                   | 2.06                           | 2.07                         |
| Cu <sup>2+</sup> | 4                   | 1.95                           | 1.97                         |
| Al <sup>3+</sup> | 6                   | 1.92                           | 1.91                         |
| Fe <sup>3+</sup> | 6                   | 2.05                           | 2.02                         |

The optimized structures of the substitution complexes formed by the metal ions and ligands are shown in Figure S2. The relative positions of the ligand's coordinating atoms and the metal atoms remain essentially unchanged.

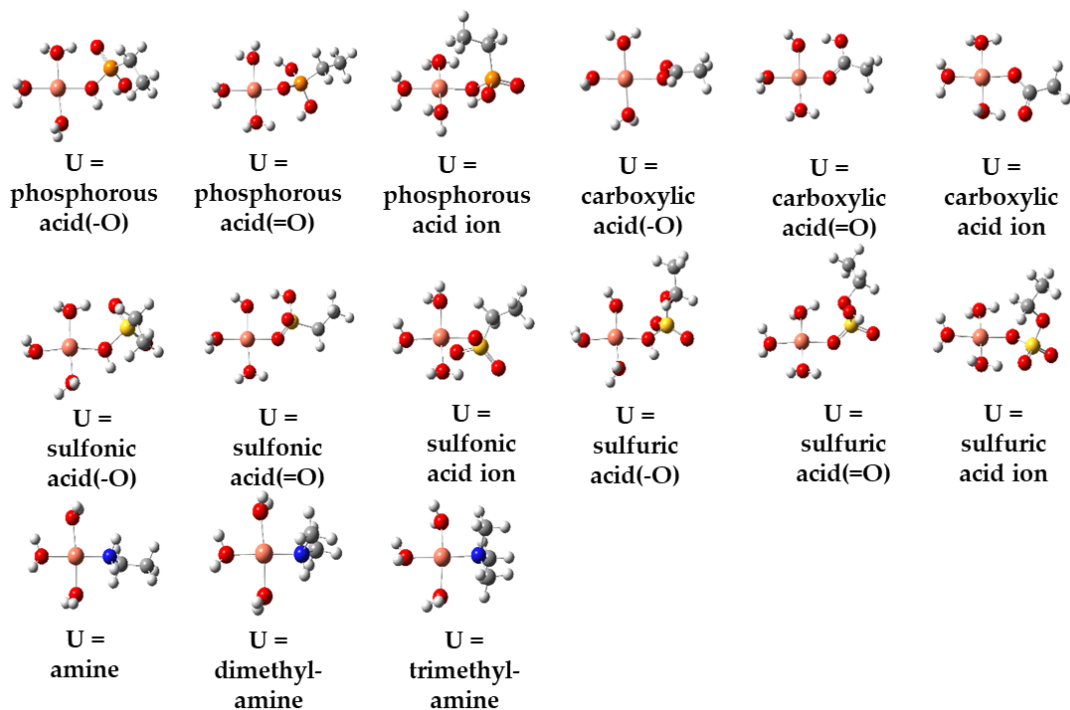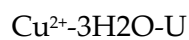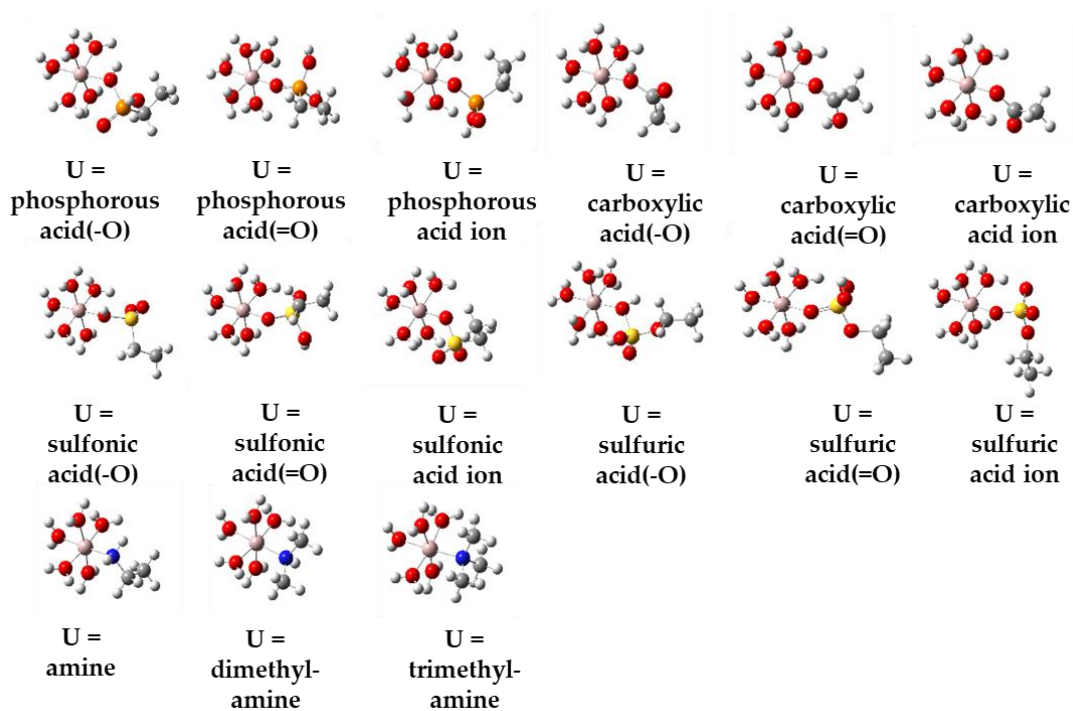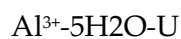

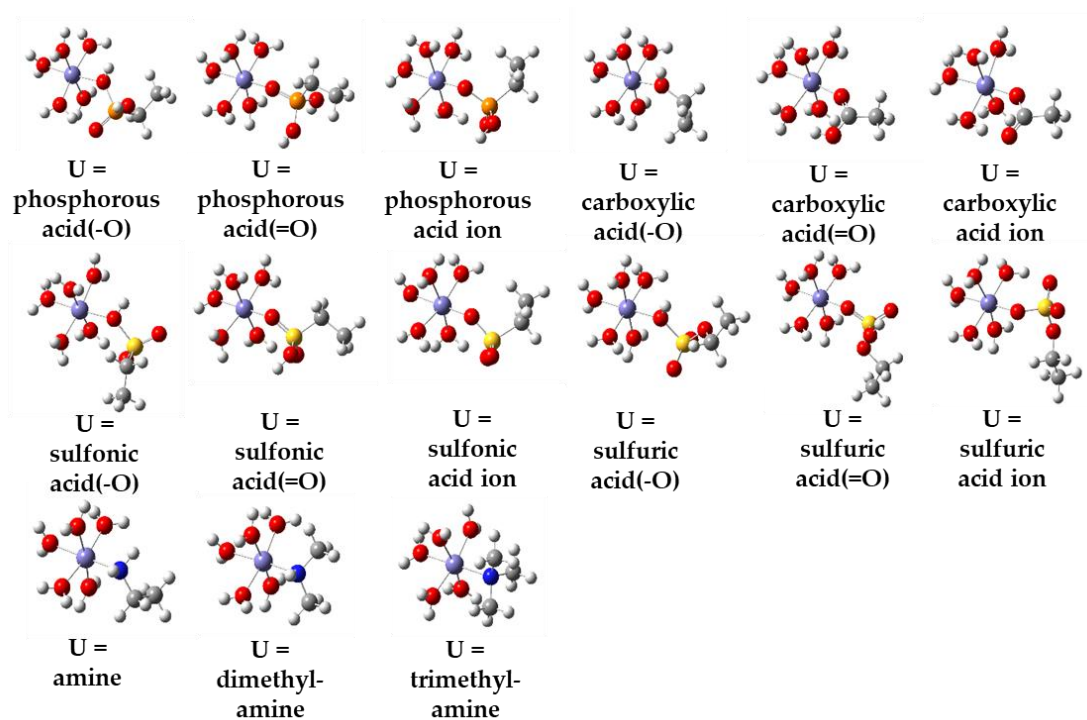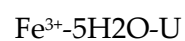

**Figure S2.** Computationally simulated geometries of binding products generated by the binding of three metal ions to eleven ligands with their different sites.

## 2. Binding strength analysis

Tables S2 and S3 summarize the binding energies and binding enthalpies of the substitution processes involving four types of metal ion hydrates and ligands.

**Table S2.** Table of metal ions and ligands binding enthalpies (eV).

| Metal ions       | Ligand               |                      |                      |                     |                     |                     |
|------------------|----------------------|----------------------|----------------------|---------------------|---------------------|---------------------|
|                  | phosphorous acid(=O) | phosphorous acid(-O) | phosphorous acid ion | carboxylic acid(=O) | carboxylic acid(-O) | carboxylic acid ion |
| Ni <sup>2+</sup> | -0.234               | 0.070                | -1.192               | -0.067              | 0.165               | -1.302              |
| Cu <sup>2+</sup> | -0.441               | -0.096               | -1.219               | -0.127              | -0.097              | -1.860              |
| Al <sup>3+</sup> | -0.593               | 0.010                | -2.124               | -0.0020             | 0.556               | -2.020              |
| Fe <sup>3+</sup> | -0.669               | -0.052               | -2.303               | -0.092              | 0.503               | -2.220              |

  

| Metal ions       | Ligand            |                   |                   |                   |                   |                   |
|------------------|-------------------|-------------------|-------------------|-------------------|-------------------|-------------------|
|                  | sulfonic acid(=O) | sulfonic acid(-O) | sulfonic acid ion | sulfuric acid(=O) | sulfuric acid(-O) | sulfuric acid ion |
| Ni <sup>2+</sup> | 0.030             | 0.143             | -0.928            | 0.193             | 0.249             | -0.611            |
| Cu <sup>2+</sup> | 0.054             | 0.219             | -0.942            | 0.151             | 0.452             | -0.899            |
| Al <sup>3+</sup> | -0.033            | 0.406             | -1.415            | 0.220             | 0.616             | -1.051            |
| Fe <sup>3+</sup> | -0.106            | 0.408             | -1.530            | 0.183             | 0.595             | -1.217            |

  

| Metal ions       | Ligand |               |                |
|------------------|--------|---------------|----------------|
|                  | amine  | dimethylamine | trimethylamine |
| Ni <sup>2+</sup> | -0.530 | -0.496        | -0.364         |
| Cu <sup>2+</sup> | -0.890 | -0.885        | -0.794         |
| Al <sup>3+</sup> | -0.452 | -0.399        | -0.221         |
| Fe <sup>3+</sup> | -0.591 | -0.555        | -0.412         |

**Table S3.** Table of metal ions and ligands binding energies (eV).

| Metal ions       | Ligand                  |                         |                         |                        |                        |                        |
|------------------|-------------------------|-------------------------|-------------------------|------------------------|------------------------|------------------------|
|                  | phosphorous<br>acid(=O) | phosphorous<br>acid(-O) | phosphorous<br>acid ion | carboxylic<br>acid(=O) | carboxylic<br>acid(-O) | carboxylic<br>acid ion |
| Ni <sup>2+</sup> | -0.222                  | 0.072                   | -1.177                  | -0.079                 | 0.177                  | -1.329                 |
| Cu <sup>2+</sup> | -0.516                  | -0.112                  | -1.200                  | -0.113                 | -0.104                 | -1.804                 |
| Al <sup>3+</sup> | -0.683                  | 0.024                   | -2.086                  | 0.007                  | 0.659                  | -1.974                 |
| Fe <sup>3+</sup> | -0.804                  | -0.096                  | -2.320                  | -0.140                 | 0.496                  | -2.248                 |
| Metal ions       | Ligand                  |                         |                         |                        |                        |                        |
|                  | sulfonic<br>acid(=O)    | sulfonic<br>acid(-O)    | sulfonic acid<br>ion    | sulfuric<br>acid(=O)   | sulfuric<br>acid(-O)   | sulfuric<br>acid ion   |
| Ni <sup>2+</sup> | 0.030                   | 0.234                   | -0.928                  | 0.193                  | 0.299                  | -0.611                 |
| Cu <sup>2+</sup> | 0.114                   | 0.325                   | -0.851                  | 0.158                  | 0.517                  | -0.908                 |
| Al <sup>3+</sup> | -0.012                  | 0.546                   | -1.393                  | 0.152                  | 0.704                  | -1.109                 |
| Fe <sup>3+</sup> | -0.092                  | 0.520                   | -1.515                  | 0.113                  | 0.679                  | -1.291                 |
| Metal ions       | Ligand                  |                         |                         |                        |                        |                        |
|                  | amine                   | dimethylamine           | trimethylamine          |                        |                        |                        |
| Ni <sup>2+</sup> | -0.530                  | -0.496                  | -0.364                  |                        |                        |                        |
| Cu <sup>2+</sup> | -0.881                  | -0.846                  | -0.746                  |                        |                        |                        |
| Al <sup>3+</sup> | -0.399                  | -0.318                  | -0.087                  |                        |                        |                        |
| Fe <sup>3+</sup> | -0.604                  | -0.591                  | -0.450                  |                        |                        |                        |

Figure S3 presents the bar graphs of the binding enthalpies and binding energies of  $\text{Ni}^{2+}$ ,  $\text{Al}^{3+}$ ,  $\text{Fe}^{3+}$  with four ligands at their single-bond oxygen and double-bond oxygen sites. Stronger binding between ligand's double-bond oxygen sites and metal ions has been observed.

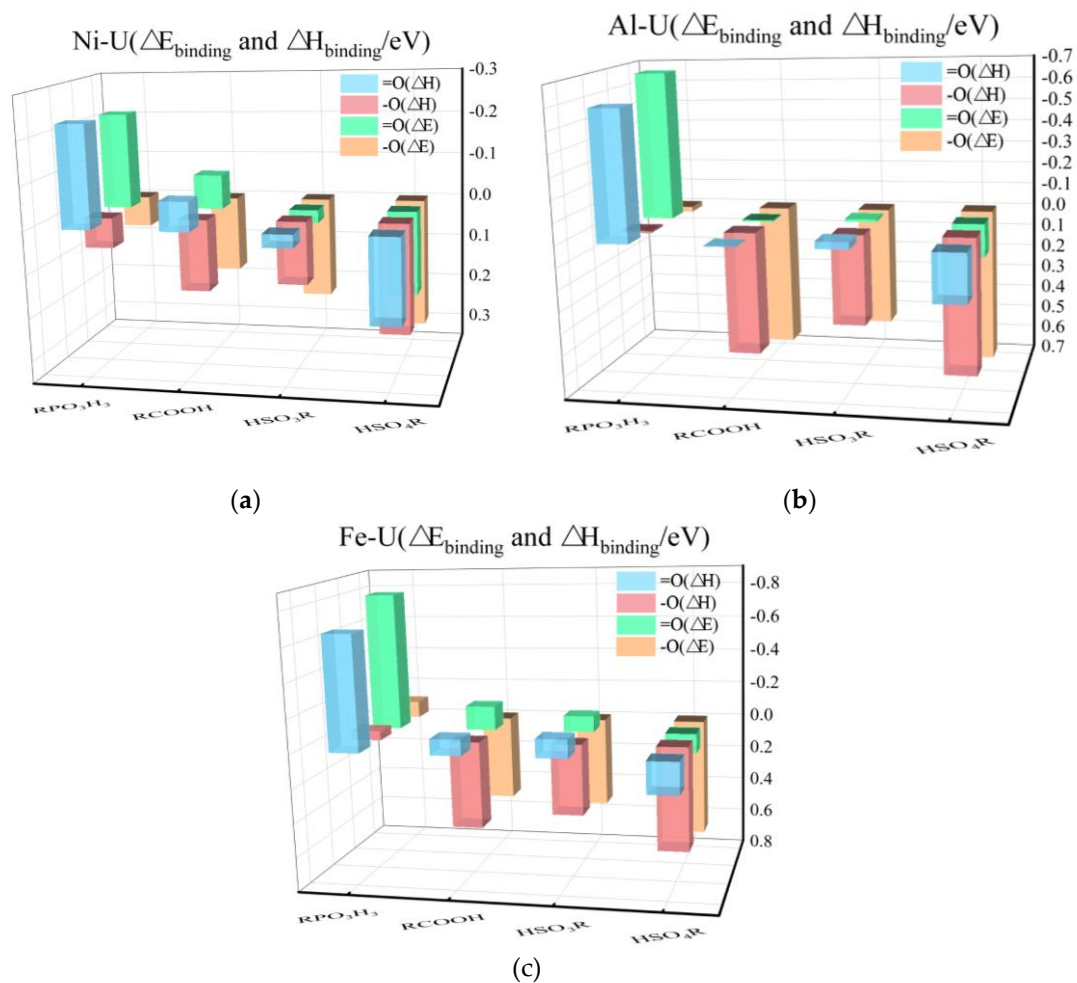

**Figure S3.** (a) Bar chart of the binding enthalpies and binding energies between nickel ions and four ligands at single and double bond oxygen sites, (b) Bar chart of the binding enthalpies and binding energies between aluminum ions and four ligands at single and double bond oxygen sites, (c) Bar chart of the binding enthalpies and binding energies between ferrous ions and four ligands at single and double bond oxygen sites.

### 3. Binding Mechanism Exploration

#### 3.1 Frontline molecular orbital analysis

Table S4 displays the frontier molecular orbital values and energy gap values of the eleven ligands studied in this research.

**Table S4.** Table of ligands frontier molecular orbital values and energy gap (eV).

| Ligand            | phosphorous<br>acid | phosphorous<br>acid ion | carboxylic<br>acid | carboxylic<br>acid ion | sulfonic<br>acid | sulfonic<br>acid ion |
|-------------------|---------------------|-------------------------|--------------------|------------------------|------------------|----------------------|
| $E_{\text{LUMO}}$ | 0.40                | 1.06                    | -0.52              | 1.49                   | 0.13             | 1.43                 |
| $E_{\text{HOMO}}$ | -7.66               | -6.06                   | -7.39              | -5.23                  | -8.28            | -5.99                |
| $\Delta E$        | 8.06                | 7.14                    | 6.86               | 6.72                   | 8.41             | 7.41                 |
| Ligand            | sulfuric<br>acid    | sulfuric<br>acid ion    | amine              | dimethylamine          | trimethylamine   |                      |
| $E_{\text{LUMO}}$ | -0.26               | 1.35                    | 1.02               | 1.10                   | 1.06             |                      |
| $E_{\text{HOMO}}$ | -8.43               | -6.38                   | -6.20              | -5.78                  | -5.55            |                      |
| $\Delta E$        | 8.16                | 7.73                    | 7.22               | 6.87                   | 6.61             |                      |



### 3.2 Electrostatic potential analysis of the ligands

Table S5 presents the electrostatic potentials of the eleven ligands studied in this paper. The results show that the electron losing potential of the four acid ligands increases after deprotonation.

**Table S5.** Ligands electrostatic potential range table (kcal/mol).

| Ligand | phosphorous<br>acid | phosphorous<br>acid ion | carboxylic<br>acid | carboxylic<br>acid ion | sulfonic<br>acid | sulfonic<br>acid ion |
|--------|---------------------|-------------------------|--------------------|------------------------|------------------|----------------------|
| ESP    | -51~58              | -155~-35                | -41~53             | -165~-65               | -44~70           | -145~-39             |
| Ligand | sulfuric<br>acid    | sulfuric<br>acid ion    | amine              | dimethylamine          | trimethylamine   |                      |
| ESP    | -40~74              | -138~-33                | -44~27             | -41~27                 | -36~10           |                      |

Figure S4 displays the electrostatic potential distribution diagrams of three nitrogen ligands. The minimum points of the electrostatic potential are distributed on the van der Waals surface of the nitrogen atom.

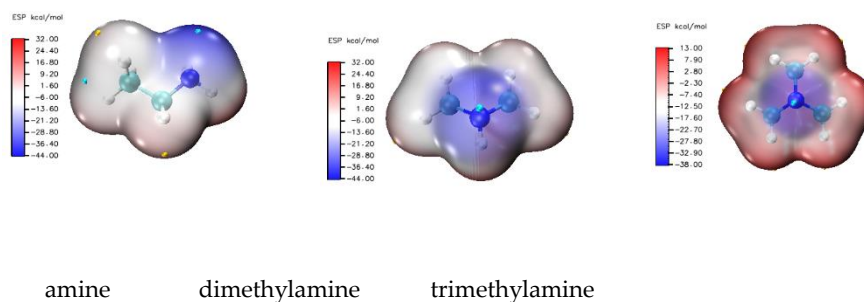

**Figure S4.** Electrostatic potential diagrams of the three nitrogen ligands (The blue point in the graph indicates the point of electrostatic potential minimum).

### 3.3 The electrophilicity $\omega$ index and the nucleophilicity $N$ index.

Figure S6 shows the electrophilicity and nucleophilicity indexes of each atom in the ligands. Based on these results, the most likely atoms to undergo electrophilic/nucleophilic reactions on the ligands can be easily identified. Table S6 presents the global electrophilicity and nucleophilicity indexes of the molecules. These results can be used to compare the electrophilic/nucleophilic potentials of different molecules.

| phosphorous acid |                  |                 |
|------------------|------------------|-----------------|
| Atom             | Electrophilicity | Nucleophilicity |
| 1(C)             | 0.01714          | 0.02975         |
| 2(H)             | 0.02538          | 0.05188         |
| 3(H)             | 0.01489          | 0.02094         |
| 4(H)             | 0.01489          | 0.02094         |
| 5(C)             | 0.02122          | 0.0315          |
| 6(H)             | 0.02528          | 0.03589         |
| 7(H)             | 0.02528          | 0.03589         |
| 8(P)             | 0.0531           | 0.19048         |
| <b>9(O)</b>      | <b>0.03376</b>   | <b>0.5765</b>   |
| 10(O)            | 0.04592          | 0.20474         |
| 11(H)            | 0.09402          | 0.06679         |
| 12(O)            | 0.04592          | 0.20474         |
| 13(H)            | 0.09402          | 0.06679         |

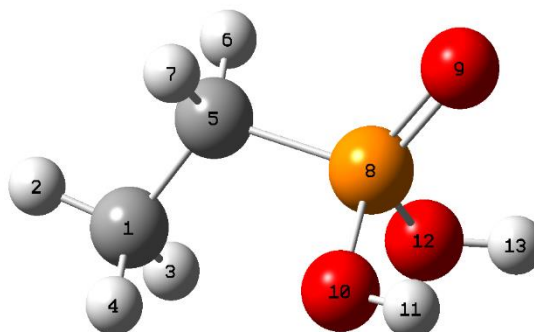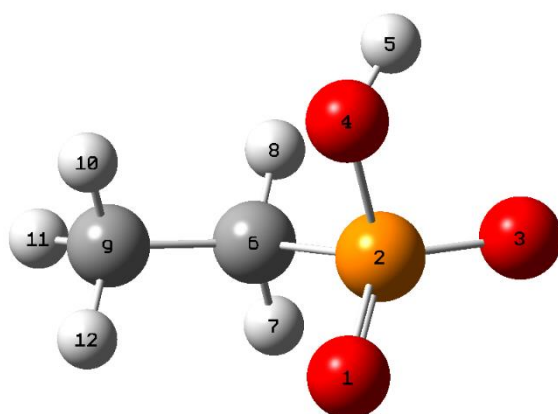

| phosphorous acid ion |                  |                 |
|----------------------|------------------|-----------------|
| Atom                 | Electrophilicity | Nucleophilicity |
| <b>1(O)</b>          | <b>0.01043</b>   | <b>1.93949</b>  |
| 2(P)                 | 0.01204          | 1.14704         |
| 3(O)                 | 0.0089           | 1.81089         |
| 4(O)                 | 0.01493          | 0.56755         |
| 5(H)                 | 0.03419          | 0.33619         |
| 6(C)                 | 0.00934          | 0.59082         |
| 7(H)                 | 0.01366          | 0.31035         |
| 8(H)                 | 0.01348          | 0.39163         |
| 9(C)                 | 0.01232          | 0.24434         |
| 10(H)                | 0.01172          | 0.18771         |
| 11(H)                | 0.01837          | 0.39544         |
| 12(H)                | 0.00988          | 0.17441         |

| carboxylic acid |                  |                 |
|-----------------|------------------|-----------------|
| Atom            | Electrophilicity | Nucleophilicity |
| 1(C)            | 0.0393           | 0.12694         |
| 2(H)            | 0.02552          | 0.07346         |
| 3(H)            | 0.04826          | 0.10689         |
| 4(H)            | 0.04818          | 0.10693         |
| 5(C)            | 0.12444          | 0.20179         |
| <b>6(O)</b>     | <b>0.1223</b>    | <b>0.69965</b>  |
| 7(O)            | 0.06169          | 0.26838         |
| 8(H)            | 0.0332           | 0.09992         |

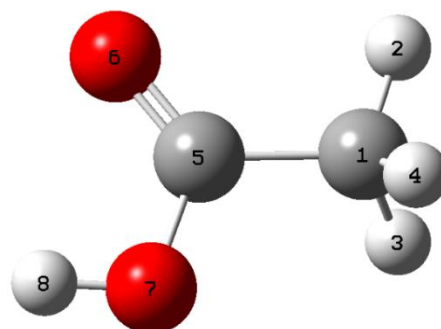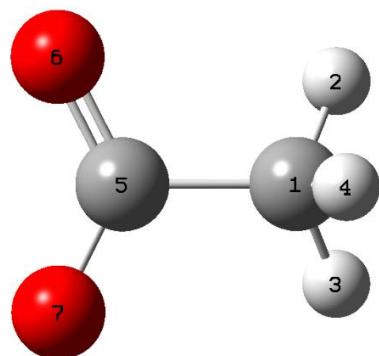

| carboxylic acid ion |                  |                 |
|---------------------|------------------|-----------------|
| Atom                | Electrophilicity | Nucleophilicity |
| 1(C)                | 0.08291          | 0.45557         |
| 2(H)                | 0.05306          | 0.5058          |
| 3(H)                | 0.05248          | 0.50248         |
| 4(H)                | 0.16671          | 0.4635          |
| 5(C)                | 0.05894          | 1.14996         |
| 6(O)                | 0.06459          | 3.2621          |
| <b>7(O)</b>         | <b>0.06434</b>   | <b>3.27521</b>  |

| sulfonic acid |                  |                 |
|---------------|------------------|-----------------|
| Atom          | Electrophilicity | Nucleophilicity |
| 1(S)          | 0.05888          | 0.09766         |
| <b>2(O)</b>   | <b>0.06067</b>   | <b>0.24065</b>  |
| 3(O)          | 0.04875          | 0.19744         |
| 4(O)          | 0.0806           | 0.07822         |
| 5(C)          | 0.03201          | 0.03804         |
| 6(H)          | 0.0349           | 0.03876         |
| 7(H)          | 0.02359          | 0.02798         |
| 8(C)          | 0.02197          | 0.01972         |
| 9(H)          | 0.01829          | 0.01782         |
| 10(H)         | 0.02146          | 0.03553         |
| 11(H)         | 0.01854          | 0.01492         |
| 12(H)         | 0.15716          | 0.03769         |

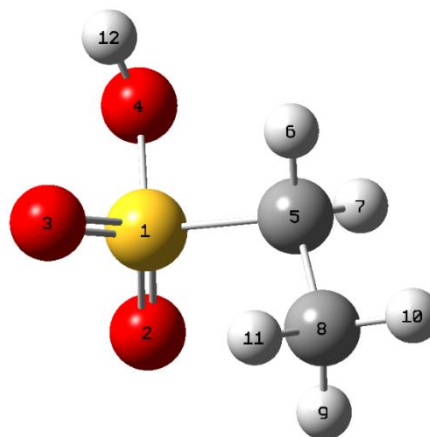

| sulfonic acid ion |                  |                 |
|-------------------|------------------|-----------------|
| Atom              | Electrophilicity | Nucleophilicity |
| 1(S)              | 0.01099          | 0.87152         |
| 2(O)              | <b>0.01218</b>   | <b>1.92557</b>  |
| 3(O)              | 0.01218          | 1.92557         |
| 4(O)              | 0.01288          | 1.93539         |
| 5(C)              | 0.01678          | 0.25209         |
| 6(H)              | 0.02518          | 0.24299         |
| 7(H)              | 0.02518          | 0.24299         |
| 8(C)              | 0.02771          | 0.14468         |
| 9(H)              | 0.02214          | 0.11684         |
| 10(H)             | 0.04477          | 0.30915         |
| 11(H)             | 0.02214          | 0.11684         |

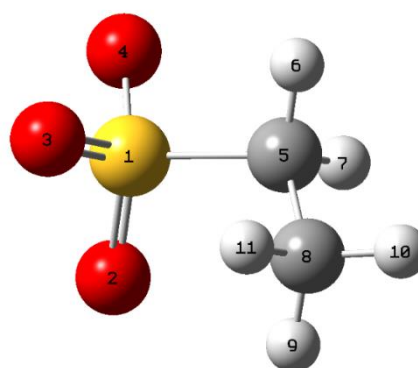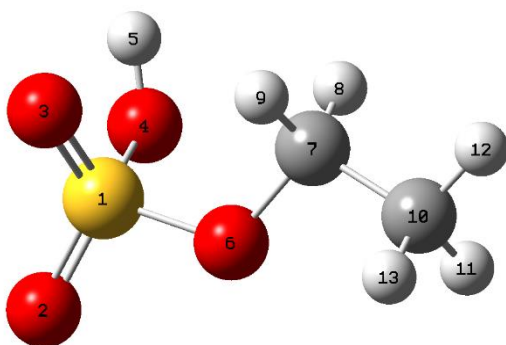

| sulfuric acid |                  |                 |
|---------------|------------------|-----------------|
| Atom          | Electrophilicity | Nucleophilicity |
| 1(S)          | 0.08109          | 0.05046         |
| 2(O)          | <b>0.08059</b>   | <b>0.12344</b>  |
| 3(O)          | 0.06278          | 0.0956          |
| 4(O)          | 0.08725          | 0.04875         |
| 5(H)          | 0.15395          | 0.02198         |
| 6(O)          | 0.0472           | 0.07944         |
| 7(C)          | 0.03301          | 0.02177         |
| 8(H)          | 0.02971          | 0.02606         |
| 9(H)          | 0.02186          | 0.02569         |
| 10(C)         | 0.02054          | 0.01405         |
| 11(H)         | 0.0156           | 0.01467         |
| 12(H)         | 0.03535          | 0.01863         |
| 13(H)         | 0.01721          | 0.01452         |

| sulfuric acid ion |                  |                 |
|-------------------|------------------|-----------------|
| Atom              | Electrophilicity | Nucleophilicity |
| 1(S)              | 0.00653          | 0.85314         |
| 2(O)              | <b>0.00679</b>   | <b>1.854</b>    |
| 3(O)              | 0.00679          | 1.854           |
| 4(O)              | 0.00829          | 1.80949         |
| 5(C)              | 0.00947          | 0.10751         |
| 6(H)              | 0.01064          | 0.11296         |
| 7(H)              | 0.01064          | 0.11296         |
| 8(O)              | 0.00372          | 0.3503          |
| 9(C)              | 0.02006          | 0.12463         |
| 10(H)             | 0.02953          | 0.20196         |
| 11(H)             | 0.01821          | 0.11931         |
| 12(H)             | 0.01821          | 0.11931         |

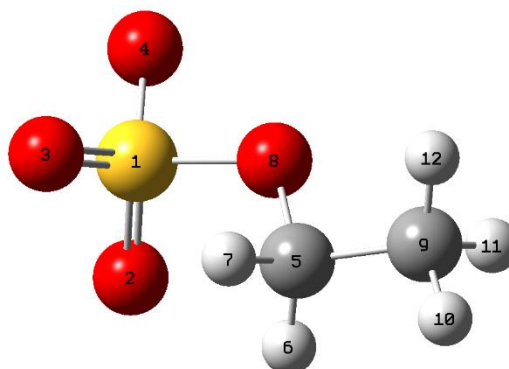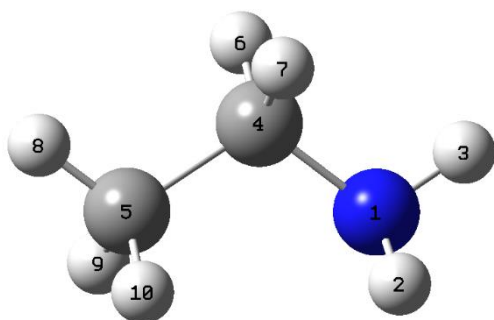

| amine |                  |                 |
|-------|------------------|-----------------|
| Atom  | Electrophilicity | Nucleophilicity |
| 1(N)  | <b>0.02501</b>   | <b>1.10716</b>  |
| 2(H)  | 0.03678          | 0.3101          |
| 3(H)  | 0.04148          | 0.31243         |
| 4(C)  | 0.01745          | 0.21851         |
| 5(C)  | 0.01668          | 0.09876         |
| 6(H)  | 0.01733          | 0.17745         |
| 7(H)  | 0.021            | 0.34238         |
| 8(H)  | 0.0225           | 0.13771         |
| 9(H)  | 0.01269          | 0.10785         |
| 10(H) | 0.01669          | 0.08891         |

| dimethylamine |                  |                 |
|---------------|------------------|-----------------|
| Atom          | Electrophilicity | Nucleophilicity |
| 1(N)          | <b>0.0134</b>    | <b>1.09637</b>  |
| 2(H)          | 0.0314           | 0.31415         |
| 3(C)          | 0.01765          | 0.23165         |
| 4(H)          | 0.01903          | 0.17869         |
| 5(H)          | 0.01446          | 0.19018         |
| 6(H)          | 0.01638          | 0.31848         |
| 7(C)          | 0.01765          | 0.23165         |
| 8(H)          | 0.01446          | 0.19018         |
| 9(H)          | 0.01903          | 0.17869         |
| 10(H)         | 0.01638          | 0.31848         |

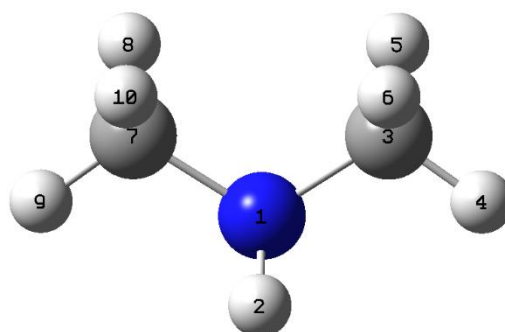

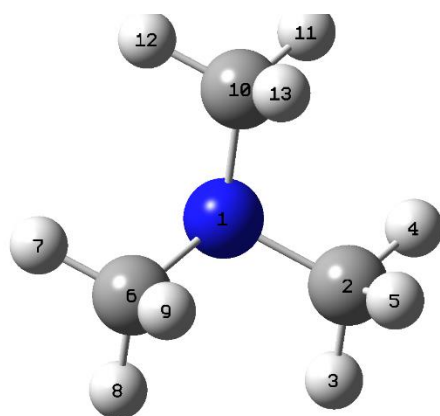

| trimethylamine |                  |                 |
|----------------|------------------|-----------------|
| Atom           | Electrophilicity | Nucleophilicity |
| <b>1(N)</b>    | <b>0.00309</b>   | <b>0.97905</b>  |
| 2(C)           | 0.01293          | 0.19634         |
| 3(H)           | 0.01475          | 0.16565         |
| 4(H)           | 0.01475          | 0.16565         |
| 5(H)           | 0.01249          | 0.29077         |
| 6(C)           | 0.01293          | 0.19631         |
| 7(H)           | 0.01475          | 0.16563         |
| 8(H)           | 0.01475          | 0.16563         |
| 9(H)           | 0.01249          | 0.29076         |
| 10(C)          | 0.01293          | 0.19631         |
| 11(H)          | 0.01475          | 0.16563         |
| 12(H)          | 0.01475          | 0.16563         |
| 13(H)          | 0.01249          | 0.29076         |

**Figure S5.** Local electrophilic indexes and nucleophilic indexes( $e^*eV$ ) plots for eleven ligands, where the atoms possessing the strongest nucleophilic indices for each ligand have been bolded.

**Table S6.** The electrophilicity  $\omega$  index and nucleophilicity N index(eV).

| Ligand   | phosphorous acid | phosphorous acid ion | carboxylic acid | carboxylic acid ion | sulfonic acid | sulfonic acid ion |
|----------|------------------|----------------------|-----------------|---------------------|---------------|-------------------|
| $\omega$ | 0.511            | 0.169                | 0.503           | 0.543               | 0.577         | 0.232             |
| N        | 1.537            | 8.096                | 1.684           | 9.615               | 0.844         | 8.084             |

  

| Ligand   | sulfuric acid | sulfuric acid ion | amine | dimethylamine | trimethylamine |
|----------|---------------|-------------------|-------|---------------|----------------|
| $\omega$ | 0.686         | 0.149             | 0.228 | 0.180         | 0.168          |
| N        | 0.555         | 7.619             | 2.901 | 3.249         | 3.434          |

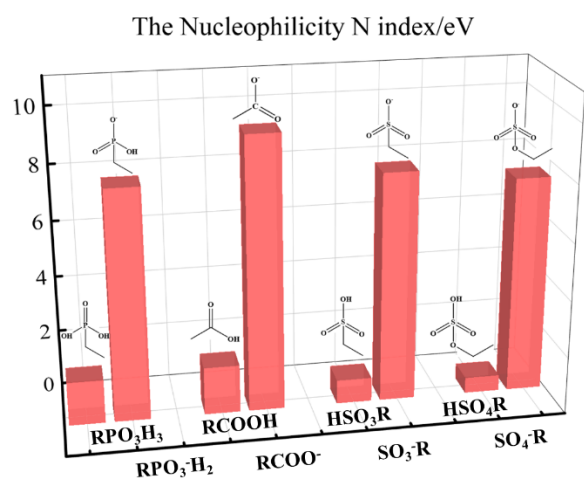

(a)

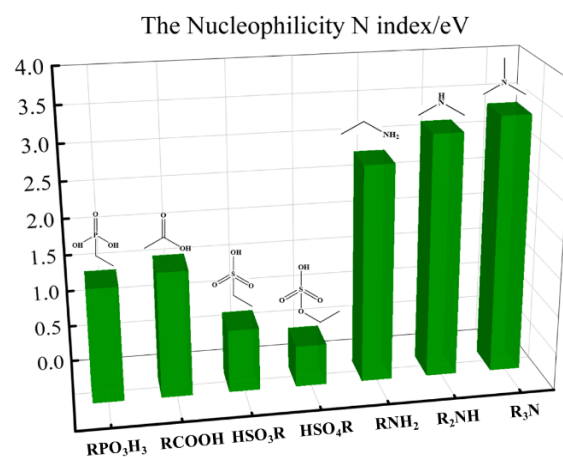

(b)

**Figure S6.** (a) Graph of the change in nucleophilic indexes of ligands before and after deprotonation, (b) Histogram of the nucleophilic indexes of the neutral ligand.



### 3.4 Energy Decomposition Analysis of Cu<sup>2+</sup> and Fe<sup>3+</sup> Complexes Based on Molecular Force Field

Table S7 presents the energy decomposition results of the coordination bonds of Cu<sup>2+</sup> and Fe<sup>3+</sup> with the eleven ligands.

**Table S7.** Energy decomposition data based on molecular force field for the coordination bonds of copper ions and iron ions with neutral ligands (KJ/mol).

| Ligand             | phosphorous acid | carboxylic acid | sulfonic acid | sulfuric acid | amine   |
|--------------------|------------------|-----------------|---------------|---------------|---------|
| Electrostatic (Cu) | -508.77          | -234.67         | 91.83         | 342.52        | -732.69 |
| Electrostatic (Fe) | -579.01          | -275.84         | 155.22        | -16.68        | -429.77 |
| Repulsive (Cu)     | 300.35           | 147.37          | 161.93        | 78.61         | 176.61  |
| Repulsive (Fe)     | 138.6            | 112.06          | 16.63         | 12.85         | 80.87   |
| Dispersion (Cu)    | -48.17           | -26.77          | -24.91        | -13.1         | -20.81  |
| Dispersion (Fe)    | -38.11           | -39.86          | -13.25        | -10.29        | -37.74  |
| Total (Cu)         | -256.59          | -114.08         | 228.85        | 408.03        | -576.89 |
| Total (Fe)         | -478.52          | -203.64         | 158.6         | -14.13        | -386.64 |

  

| Ligand             | dimethyl amine | trimethylamine | water   |
|--------------------|----------------|----------------|---------|
| Electrostatic (Cu) | -532.95        | -449.87        | -195.71 |
| Electrostatic (Fe) | -312.81        | -254.91        | -213.78 |
| Repulsive (Cu)     | 157.6          | 131.86         | 146.4   |
| Repulsive (Fe)     | 77.8           | 80.29          | 89.67   |
| Dispersion (Cu)    | -20.74         | -19.07         | -17.59  |
| Dispersion (Fe)    | -40.55         | -48.96         | -25.88  |
| Total (Cu)         | -396.09        | -337.08        | -66.9   |
| Total (Fe)         | -275.56        | -223.58        | -149.99 |

### 3.5 Analysis of the electrostatic potential of bound complexes.

Table S8 presents the electrostatic potentials of the products resulting from the substitution processes involving four types of metal ions and eleven ligands.

**Table S8.** The electrostatic potential range of the complexes (kcal/mol).

| Metal ions       | Ligand           |                      |                 |                     |               |                   |
|------------------|------------------|----------------------|-----------------|---------------------|---------------|-------------------|
|                  | phosphorous acid | phosphorous acid ion | carboxylic acid | carboxylic acid ion | sulfonic acid | Sulfonic acid ion |
| Ni <sup>2+</sup> | 96~237           | -4~159               | 101~224         | 15~159              | 96~221        | 12~163            |
| Cu <sup>2+</sup> | 96~250           | -29~193              | 114~257         | 20~136              | 95~250        | -1~183            |
| Al <sup>3+</sup> | 138~326          | 69~244               | 169~322         | 75~251              | 150~313       | 81~257            |
| Fe <sup>3+</sup> | 142~328          | 77~230               | 176~329         | 87~235              | 155~313       | 66~243            |

  

| Metal ions       | Ligand        |                   |         |               |                |
|------------------|---------------|-------------------|---------|---------------|----------------|
|                  | sulfuric acid | sulfuric acid ion | amine   | dimethylamine | trimethylamine |
| Ni <sup>2+</sup> | 98~222        | 17~168            | 105~230 | 130~228       | 128~229        |
| Cu <sup>2+</sup> | 94~241        | -3~180            | 113~249 | 144~247       | 139~247        |
| Al <sup>3+</sup> | 138~313       | 56~257            | 169~332 | 194~332       | 194~326        |
| Fe <sup>3+</sup> | 156~306       | 62~241            | 170~322 | 198~324       | 198~315        |
